# Supplementary material for: A combined experimental–theoretical study on the lithiation/electrophilic quench reaction of benzylic position of (η5-tetramethylcyclohexadienyl)-Mn(CO)3
Source: Royal Society of Chemistry journal article supplement (doi:10.1039/c1nj20178f), 2011-01-01
Supplement: c1nj20178f.pdf [file c1nj20178f.pdf]

# Neutral complexes

---

## Compound 8:

35

SCF Done: E(RB+HF-LYP) = -1920.41955190 A.U. after 23 cycles

|    |          |          |          |
|----|----------|----------|----------|
| C  | 2.33134  | 0.19607  | 0.05072  |
| C  | 2.28474  | 0.0674   | 1.45508  |
| C  | 1.11813  | -0.69192 | 2.05459  |
| C  | -0.1224  | -0.09063 | 1.42624  |
| C  | -0.147   | 0.02703  | 0.02088  |
| C  | 1.09748  | 0.15399  | -0.70112 |
| Mn | 0.96863  | 1.77172  | 0.73926  |
| C  | -0.3802  | 2.82684  | 0.15933  |
| O  | -1.24776 | 3.50311  | -0.21007 |
| C  | 1.09238  | 0.12631  | -2.21585 |
| C  | 2.15252  | 3.01052  | 0.16082  |
| O  | 2.91009  | 3.8089   | -0.20683 |
| C  | 0.92597  | 2.3615   | 2.43797  |
| O  | 0.90373  | 2.69605  | 3.5496   |
| H  | 1.19188  | -1.78667 | 1.90375  |
| H  | 1.09493  | -0.52865 | 3.13681  |
| C  | 3.50589  | 0.20861  | 2.33653  |
| C  | 3.64479  | 0.40761  | -0.67835 |
| C  | -1.44819 | 0.04081  | -0.75706 |
| C  | -1.37521 | -0.10851 | 2.27256  |
| H  | -2.1586  | 0.55799  | 1.90553  |
| H  | -1.79391 | -1.12497 | 2.32873  |
| H  | -1.14133 | 0.19703  | 3.29714  |
| H  | -1.4718  | 0.80011  | -1.54116 |
| H  | -1.57966 | -0.93489 | -1.24299 |
| H  | -2.31136 | 0.20075  | -0.11194 |
| H  | 2.05961  | 0.39721  | -2.63745 |
| H  | 0.85146  | -0.88264 | -2.57855 |
| H  | 0.35219  | 0.80762  | -2.64112 |
| H  | 3.58537  | 1.16787  | -1.4595  |
| H  | 4.44504  | 0.69704  | 0.0016   |
| H  | 3.94684  | -0.53465 | -1.15347 |
| H  | 4.20231  | 0.97956  | 2.00048  |
| H  | 3.20611  | 0.46342  | 3.35773  |
| H  | 4.05655  | -0.74285 | 2.39293  |

## Compound 7:

32

SCF Done: E(RB+HF-LYP) = -1881.10802034 A.U. after 22 cycles

|    |         |          |          |
|----|---------|----------|----------|
| C  | 0.67546 | -2.55053 | 0.56617  |
| C  | 0.17509 | -1.44846 | -0.15203 |
| C  | 1.17716 | -0.55427 | -0.86052 |
| C  | 2.27114 | -0.24269 | 0.14566  |
| C  | 2.81787 | -1.31677 | 0.87219  |
| C  | 2.01294 | -2.48383 | 1.0731   |
| Mn | 0.93753 | -0.8256  | 1.90418  |
| C  | 1.90016 | -0.29433 | 3.34227  |
| O  | 2.51149 | 0.05268  | 4.26458  |
| C  | -1.2501 | -1.38223 | -0.64609 |
| C  | 3.00457 | 1.06326  | -0.04444 |

|   |          |          |          |
|---|----------|----------|----------|
| C | 4.19811  | -1.28107 | 1.49256  |
| C | -0.14581 | -3.78526 | 0.87017  |
| C | -0.2809  | -1.55133 | 3.02863  |
| O | -1.06435 | -2.00949 | 3.75052  |
| C | 0.06948  | 0.73632  | 1.69754  |
| O | -0.48018 | 1.74125  | 1.50935  |
| H | 1.57077  | -1.00811 | -1.79154 |
| H | 0.6838   | 0.37724  | -1.15811 |
| H | 3.65325  | 1.32199  | 0.7952   |
| H | 3.62978  | 1.02194  | -0.9496  |
| H | 2.29639  | 1.88618  | -0.18463 |
| H | 4.2962   | -2.03204 | 2.28094  |
| H | 4.94771  | -1.49909 | 0.72149  |
| H | 4.44707  | -0.30899 | 1.92229  |
| H | 0.27844  | -4.345   | 1.70788  |
| H | -1.18585 | -3.55739 | 1.11084  |
| H | -0.15066 | -4.44182 | -0.00901 |
| H | -1.95856 | -1.89531 | 0.00781  |
| H | -1.57644 | -0.34137 | -0.73918 |
| H | -1.33052 | -1.83363 | -1.64689 |
| H | 2.4157   | -3.32208 | 1.63061  |

#### Compound 9:

|           |                |                |                      |
|-----------|----------------|----------------|----------------------|
| 20        |                |                |                      |
| SCF Done: | E(RB+HF-LYP) = | -1723.82889781 | A.U. after 19 cycles |
| 6         | 1.15303        | -0.80109       | 2.09193              |
| 6         | -0.08568       | -0.23167       | 1.42699              |
| 6         | -0.11764       | -0.07403       | 0.0386               |
| 6         | 1.09631        | 0.0892         | -0.69607             |
| 6         | 2.31114        | 0.12999        | 0.05421              |
| 6         | 2.2881         | -0.03283       | 1.44206              |
| 1         | 1.2454         | -1.8943        | 1.96704              |
| 1         | 1.12971        | -0.60354       | 3.1671               |
| 1         | 3.20162        | 0.14886        | 2.00058              |
| 1         | 3.22642        | 0.43359        | -0.44645             |
| 1         | 1.09164        | 0.22585        | -1.77023             |
| 1         | -1.06433       | 0.0727         | -0.47411             |
| 1         | -1.02374       | -0.20573       | 1.97366              |
| 25        | 0.95442        | 1.66865        | 0.76673              |
| 6         | 0.89995        | 2.27216        | 2.46803              |
| 8         | 0.86956        | 2.61953        | 3.57277              |
| 6         | -0.41401       | 2.70395        | 0.17982              |
| 8         | -1.29028       | 3.35745        | -0.20188             |
| 6         | 2.13319        | 2.91894        | 0.18673              |
| 8         | 2.88927        | 3.71025        | -0.19114             |

## Deprotonated compounds

---

#### Compound 8 in position C7 :

|           |                |                |                      |
|-----------|----------------|----------------|----------------------|
| 34        |                |                |                      |
| SCF Done: | E(RB+HF-LYP) = | -1919.86151723 | A.U. after 22 cycles |
| C         | 2.15822        | 0.25016        | 0.00561              |
| C         | 2.23182        | 0.13211        | 1.42577              |
| C         | 1.04885        | -0.41212       | 2.05019              |
| C         | 0.41694        | -1.62606       | 1.38384              |

|    |          |          |          |
|----|----------|----------|----------|
| C  | 0.28217  | -1.43162 | -0.11077 |
| C  | 0.92765  | -0.21265 | -0.62716 |
| Mn | 0.61152  | 1.37142  | 0.89356  |
| C  | -1.15867 | 1.18559  | 1.06292  |
| O  | -2.31266 | 1.02973  | 1.19102  |
| C  | 3.47459  | 0.52143  | 2.20105  |
| C  | 0.93181  | -0.46017 | 3.56286  |
| C  | -0.41745 | -2.31884 | -0.85812 |
| C  | 0.70663  | 0.06413  | -2.10398 |
| C  | 3.33984  | 0.73163  | -0.81128 |
| C  | 0.66313  | 2.71356  | -0.29249 |
| O  | 0.69973  | 3.59807  | -1.0647  |
| C  | 0.86288  | 2.5284   | 2.22974  |
| O  | 1.03359  | 3.29022  | 3.10833  |
| H  | 1.00459  | -2.5399  | 1.59939  |
| H  | -0.57845 | -1.80037 | 1.81455  |
| H  | -0.54227 | -2.21792 | -1.93091 |
| H  | -0.91429 | -3.16557 | -0.38907 |
| H  | 1.06601  | 1.05063  | -2.40335 |
| H  | 1.202    | -0.68484 | -2.74576 |
| H  | -0.36285 | 0.02926  | -2.3382  |
| H  | 3.94653  | 1.46371  | -0.27205 |
| H  | 3.99422  | -0.11538 | -1.07257 |
| H  | 3.02798  | 1.19587  | -1.74876 |
| H  | 3.96467  | 1.41132  | 1.79655  |
| H  | 3.24328  | 0.72752  | 3.24829  |
| H  | 4.20976  | -0.299   | 2.18664  |
| H  | 1.28248  | 0.45193  | 4.05315  |
| H  | -0.11737 | -0.59595 | 3.85296  |
| H  | 1.49382  | -1.31015 | 3.99247  |

#### Compound 8 in position C9

34

|           |                |                |          |       |           |
|-----------|----------------|----------------|----------|-------|-----------|
| SCF Done: | E(RB+HF-LYP) = | -1919.84204396 | A.U.     | after | 23 cycles |
| C         | 2.22836        | 0.32123        | 0.01358  |       |           |
| C         | 2.24432        | 0.10288        | 1.43003  |       |           |
| C         | 1.19235        | -0.62222       | 2.05778  |       |           |
| C         | 0.4013         | -1.58866       | 1.19698  |       |           |
| C         | 0.09772        | -0.79643       | -0.06778 |       |           |
| C         | 1.31922        | -0.48347       | -0.83682 |       |           |
| Mn        | 0.37943        | 1.11248        | 0.96331  |       |           |
| C         | -1.20986       | 0.94492        | 1.75457  |       |           |
| O         | -2.25063       | 0.79187        | 2.27213  |       |           |
| C         | 3.36948        | 0.69573        | 2.26119  |       |           |
| C         | 1.15312        | -0.87813       | 3.55029  |       |           |
| C         | -1.11126       | -1.27068       | -0.84253 |       |           |
| C         | 1.50478        | -0.70033       | -2.16953 |       |           |
| C         | 3.34777        | 1.07446        | -0.67296 |       |           |
| C         | -0.15456       | 2.09154        | -0.44607 |       |           |
| O         | -0.50438       | 2.71193        | -1.37303 |       |           |
| C         | 0.87907        | 2.55995        | 1.91038  |       |           |
| O         | 1.15483        | 3.52126        | 2.52481  |       |           |
| H         | 0.92755        | -2.55682       | 1.0214   |       |           |
| H         | -0.53876       | -1.83685       | 1.70684  |       |           |
| H         | -1.35635       | -0.59409       | -1.66959 |       |           |
| H         | -0.95108       | -2.27536       | -1.27948 |       |           |
| H         | -1.99062       | -1.33865       | -0.18981 |       |           |
| H         | 2.36912        | -0.3209        | -2.70544 |       |           |
| H         | 0.7545         | -1.21291       | -2.76266 |       |           |

|   |         |          |          |
|---|---------|----------|----------|
| H | 3.75837 | 1.87725  | -0.05732 |
| H | 4.17959 | 0.40325  | -0.94424 |
| H | 2.98477 | 1.52578  | -1.60107 |
| H | 3.65856 | 1.69668  | 1.93532  |
| H | 3.10918 | 0.76196  | 3.318    |
| H | 4.2583  | 0.05325  | 2.17971  |
| H | 1.46788 | -0.02187 | 4.15348  |
| H | 0.13069 | -1.12623 | 3.85682  |
| H | 1.78868 | -1.7366  | 3.83177  |

### Compound 8 in position C11

34

SCF Done: E(RB+HF-LYP) = -1919.83487512 A.U. after 22 cycles

|    |          |          |          |
|----|----------|----------|----------|
| C  | 2.50099  | 0.04529  | 0.01453  |
| C  | 2.23902  | 0.20888  | 1.45693  |
| C  | 1.20603  | -0.55587 | 2.05368  |
| C  | 0.61565  | -1.66475 | 1.20228  |
| C  | 0.22007  | -0.94969 | -0.07607 |
| C  | 1.23859  | -0.19201 | -0.7097  |
| Mn | 0.25388  | 1.04408  | 0.8616   |
| C  | -1.29125 | 0.68713  | 1.65786  |
| O  | -2.32213 | 0.47531  | 2.18274  |
| C  | 3.27652  | 0.94376  | 2.27538  |
| C  | 1.05311  | -0.68805 | 3.55239  |
| C  | -0.96787 | -1.50528 | -0.82908 |
| C  | 1.21832  | 0.10807  | -2.19161 |
| C  | 3.71058  | 0.2702   | -0.58529 |
| C  | -0.35763 | 2.08682  | -0.4577  |
| O  | -0.77897 | 2.7632   | -1.32147 |
| C  | 0.69629  | 2.52122  | 1.77028  |
| O  | 0.97093  | 3.48577  | 2.38321  |
| H  | 1.31145  | -2.51856 | 1.03842  |
| H  | -0.27927 | -2.06848 | 1.69096  |
| H  | -1.35214 | -0.82042 | -1.58962 |
| H  | -0.70666 | -2.45232 | -1.33447 |
| H  | -1.79177 | -1.72182 | -0.14024 |
| H  | 1.72313  | 1.05425  | -2.4084  |
| H  | 1.75096  | -0.68324 | -2.74356 |
| H  | 0.2052   | 0.16627  | -2.59436 |
| H  | 4.58621  | 0.55177  | -0.01099 |
| H  | 3.82319  | 0.24573  | -1.6635  |
| H  | 3.63139  | 1.83542  | 1.75018  |
| H  | 2.89792  | 1.25454  | 3.25117  |
| H  | 4.14914  | 0.29332  | 2.44796  |
| H  | 1.25577  | 0.24388  | 4.08625  |
| H  | 0.033    | -0.99464 | 3.80807  |
| H  | 1.73618  | -1.45848 | 3.95264  |

### Compound 7 in position C7

31

SCF Done: E(RB+HF-LYP) = -1880.54829483 A.U. after 23 cycles

|   |          |          |          |
|---|----------|----------|----------|
| 6 | -0.43546 | -0.60068 | -0.20024 |
| 6 | 0.40297  | 0.04192  | -1.3006  |
| 6 | 1.64495  | 0.71632  | -0.74919 |
| 6 | 1.92311  | 0.41884  | 0.66105  |
| 6 | 1.48952  | -0.8433  | 1.20713  |

|    |          |          |          |
|----|----------|----------|----------|
| 6  | 0.2663   | -1.40628 | 0.76781  |
| 6  | 2.39102  | 1.53666  | -1.52787 |
| 25 | -0.07775 | 0.47525  | 1.66409  |
| 6  | -1.58424 | -0.02731 | 2.47498  |
| 8  | -2.57429 | -0.36652 | 3.01022  |
| 6  | 3.15101  | 1.05763  | 1.27816  |
| 6  | -0.20367 | -2.74514 | 1.29184  |
| 6  | -1.81451 | -1.01386 | -0.67644 |
| 6  | -0.66415 | 2.03004  | 1.00665  |
| 8  | -1.05609 | 3.0308   | 0.54048  |
| 6  | 0.59511  | 1.04235  | 3.2275   |
| 8  | 1.02778  | 1.41651  | 4.2528   |
| 1  | 2.0692   | -1.33355 | 1.98716  |
| 1  | 0.68929  | -0.71126 | -2.06129 |
| 1  | -0.20592 | 0.7868   | -1.83029 |
| 1  | 3.28367  | 2.0361   | -1.16528 |
| 1  | 2.09046  | 1.75654  | -2.54989 |
| 1  | 3.26337  | 0.76635  | 2.32674  |
| 1  | 4.06879  | 0.76121  | 0.74299  |
| 1  | 3.09758  | 2.1519   | 1.2443   |
| 1  | 0.29338  | -2.98719 | 2.23836  |
| 1  | -1.28254 | -2.77081 | 1.46808  |
| 1  | 0.02887  | -3.54674 | 0.57389  |
| 1  | -2.43895 | -1.42075 | 0.12386  |
| 1  | -2.34729 | -0.151   | -1.09492 |
| 1  | -1.75997 | -1.77487 | -1.47689 |

#### Compound 7 in position C9

|           |                |                |                      |
|-----------|----------------|----------------|----------------------|
| 31        |                |                |                      |
| SCF Done: | E(RB+HF-LYP) = | -1880.52845498 | A.U. after 23 cycles |
| 6         | 1.28524        | -1.58395       | -0.2983              |
| 6         | 1.13359        | -0.17282       | -0.83999             |
| 6         | 2.22437        | 0.63507        | -0.13968             |
| 6         | 3.58575        | 0.20397        | -0.51712             |
| 6         | 3.71282        | -1.22666       | -0.20731             |
| 6         | 2.6032         | -2.11007       | -0.25107             |
| 25        | 2.34172        | -0.83171       | 1.49156              |
| 6         | 2.46607        | -2.24159       | 2.6044               |
| 8         | 2.52906        | -3.12788       | 3.37077              |
| 6         | 1.96579        | 2.12172        | -0.04973             |
| 6         | 4.63828        | 0.9913         | -0.87443             |
| 6         | 2.87331        | -3.60037       | -0.17218             |
| 6         | 0.06721        | -2.47711       | -0.36807             |
| 6         | 0.83141        | -0.20197       | 2.19672              |
| 8         | -0.17666       | 0.22425        | 2.61679              |
| 6         | 3.4861         | 0.15681        | 2.46636              |
| 8         | 4.22162        | 0.81462        | 3.0917               |
| 1         | 4.7082         | -1.66244       | -0.14849             |
| 1         | 1.16872        | -0.1262        | -1.95441             |
| 1         | 0.15037        | 0.21901        | -0.5478              |
| 1         | 2.70808        | 2.62404        | 0.58186              |
| 1         | 2.00407        | 2.60629        | -1.04458             |
| 1         | 0.97267        | 2.32383        | 0.37063              |
| 1         | 5.63908        | 0.57566        | -0.97223             |
| 1         | 4.53636        | 2.06543        | -0.99082             |
| 1         | 3.88293        | -3.79288       | 0.20404              |
| 1         | 2.17058        | -4.12748       | 0.47796              |
| 1         | 2.79509        | -4.04568       | -1.17422             |
| 1         | 0.17504        | -3.40133       | 0.20743              |

|   |  |          |          |          |
|---|--|----------|----------|----------|
| 1 |  | -0.81349 | -1.95184 | 0.01927  |
| 1 |  | -0.16257 | -2.7603  | -1.41087 |

### Compound 7 in position C3

31  
SCF Done: E(RB+HF-LYP) = -1880.48988271 A.U. after 23 cycles

|    |  |          |          |          |
|----|--|----------|----------|----------|
| 6  |  | 0.17213  | -1.4325  | -0.11733 |
| 6  |  | 1.16462  | -0.5493  | -0.84491 |
| 6  |  | 2.244    | -0.24785 | 0.17471  |
| 6  |  | 2.78118  | -1.3543  | 0.88747  |
| 6  |  | 2.0546   | -2.58394 | 1.09466  |
| 6  |  | 0.70397  | -2.54637 | 0.58971  |
| 25 |  | 0.91239  | -0.79542 | 1.89635  |
| 6  |  | -0.29729 | -1.5317  | 3.00126  |
| 8  |  | -1.09631 | -1.98539 | 3.72358  |
| 6  |  | 3.00299  | 1.0451   | -0.0344  |
| 6  |  | 4.17837  | -1.27324 | 1.48702  |
| 6  |  | -0.16407 | -3.76811 | 0.85837  |
| 6  |  | -1.25109 | -1.3866  | -0.63102 |
| 6  |  | 0.07383  | 0.7538   | 1.66735  |
| 8  |  | -0.47376 | 1.77472  | 1.48429  |
| 6  |  | 1.88455  | -0.30886 | 3.32676  |
| 8  |  | 2.49885  | 0.02943  | 4.2617   |
| 1  |  | 1.56257  | -1.01377 | -1.77659 |
| 1  |  | 0.67436  | 0.38433  | -1.15185 |
| 1  |  | 3.63471  | 1.31415  | 0.81599  |
| 1  |  | 3.6559   | 0.97235  | -0.92209 |
| 1  |  | 2.31258  | 1.87825  | -0.21424 |
| 1  |  | 4.29383  | -2.07315 | 2.22142  |
| 1  |  | 4.9235   | -1.42967 | 0.69225  |
| 1  |  | 4.40869  | -0.31394 | 1.96215  |
| 1  |  | 0.31253  | -4.37498 | 1.6312   |
| 1  |  | -1.1884  | -3.53409 | 1.16699  |
| 1  |  | -0.23132 | -4.37355 | -0.05838 |
| 1  |  | -1.96341 | -1.87504 | 0.03899  |
| 1  |  | -1.58131 | -0.34976 | -0.76964 |
| 1  |  | -1.32692 | -1.88261 | -1.61482 |

## Lithiated compounds

---

### Compound 8 in position C7 in conformation trans

59  
SCF Done: E(RB+HF-LYP) = -2275.15913681 A.U. after 23 cycles

|   |  |          |          |          |
|---|--|----------|----------|----------|
| 6 |  | 0.26048  | -0.51635 | 1.11704  |
| 6 |  | -0.23857 | -0.67096 | -0.30625 |
| 6 |  | 0.55941  | 0.1937   | -1.26271 |
| 6 |  | 1.82415  | 0.68373  | -0.77982 |
| 6 |  | 2.49865  | 0.04908  | 0.36097  |
| 6 |  | 1.6837   | -0.61167 | 1.32673  |

|    |          |          |          |
|----|----------|----------|----------|
| 6  | 0.03675  | 0.42516  | -2.52743 |
| 25 | 1.17779  | 1.44389  | 1.22876  |
| 6  | 1.08277  | 1.61639  | 3.009    |
| 8  | 1.02873  | 1.71186  | 4.17079  |
| 6  | 2.61123  | 1.56426  | -1.73386 |
| 6  | 2.29035  | -1.34771 | 2.50575  |
| 6  | -0.71938 | -1.04877 | 2.14534  |
| 6  | -0.36501 | 2.29679  | 0.88212  |
| 8  | -1.38877 | 2.79878  | 0.63962  |
| 6  | 2.29708  | 2.85565  | 1.14302  |
| 8  | 3.02583  | 3.76502  | 1.08917  |
| 3  | 0.67863  | -1.61355 | -2.89004 |
| 7  | -0.41522 | -3.04777 | -3.93534 |
| 6  | -0.50752 | -2.60082 | -5.33813 |
| 6  | 0.44076  | -4.24762 | -3.79802 |
| 6  | 1.93196  | -3.90452 | -3.88281 |
| 7  | 2.32583  | -2.8792  | -2.89022 |
| 6  | 3.59873  | -2.23874 | -3.27366 |
| 6  | -1.76822 | -3.30107 | -3.40624 |
| 6  | 2.45409  | -3.45638 | -1.5357  |
| 6  | 4.01179  | -0.01603 | 0.43629  |
| 1  | -0.22343 | -1.74319 | -0.62621 |
| 1  | -1.29442 | -0.37832 | -0.36236 |
| 1  | 0.51414  | 1.10456  | -3.2267  |
| 1  | -1.02613 | 0.25067  | -2.69487 |
| 1  | 3.44326  | 2.07471  | -1.24837 |
| 1  | 3.02257  | 0.99546  | -2.58519 |
| 1  | 1.96818  | 2.34319  | -2.15525 |
| 1  | 3.14464  | -0.82474 | 2.94194  |
| 1  | 1.56103  | -1.49692 | 3.30301  |
| 1  | 2.63744  | -2.34524 | 2.19677  |
| 1  | -0.43681 | -0.81012 | 3.17322  |
| 1  | -1.71162 | -0.61357 | 1.97954  |
| 1  | -0.83506 | -2.14502 | 2.07756  |
| 1  | 0.19745  | -5.00421 | -4.56324 |
| 1  | 0.22012  | -4.70243 | -2.82739 |
| 1  | 2.16668  | -3.51242 | -4.8776  |
| 1  | 2.52375  | -4.82746 | -3.76114 |
| 1  | -2.36924 | -2.39241 | -3.49421 |
| 1  | -2.27905 | -4.11198 | -3.95073 |
| 1  | -1.71002 | -3.57107 | -2.34825 |
| 1  | -1.10479 | -1.68691 | -5.38905 |
| 1  | 0.48395  | -2.37732 | -5.74014 |
| 1  | -0.97682 | -3.36532 | -5.9792  |
| 1  | 2.67407  | -2.66061 | -0.82058 |
| 1  | 1.51983  | -3.93275 | -1.22825 |
| 1  | 3.25793  | -4.20946 | -1.49376 |
| 1  | 3.85262  | -1.46815 | -2.54246 |
| 1  | 4.42606  | -2.96555 | -3.31941 |
| 1  | 3.49714  | -1.76378 | -4.25368 |
| 1  | 4.3688   | -0.03556 | 1.46746  |
| 1  | 4.39556  | -0.92476 | -0.05486 |
| 1  | 4.4878   | 0.83528  | -0.05188 |

#### Compound 8 in position C7 in conformation cis

59  
SCF Done: E(RB+HF-LYP) = -2275.17906943 A.U. after 24 cycles  
6 1.76552 -0.76476 1.32098  
6 0.35476 -0.4816 1.24372

|    |          |          |          |
|----|----------|----------|----------|
| 6  | -0.26446 | -0.55334 | -0.14512 |
| 6  | 0.51397  | 0.29077  | -1.12695 |
| 6  | 1.85999  | 0.65235  | -0.69795 |
| 6  | 2.55556  | -0.1642  | 0.29775  |
| 25 | 1.53159  | 1.34565  | 1.37662  |
| 6  | 2.88232  | 2.5437   | 1.31697  |
| 8  | 3.73805  | 3.335    | 1.26242  |
| 6  | -0.59391 | -0.94079 | 2.33483  |
| 6  | -0.08132 | 0.69573  | -2.29472 |
| 6  | 2.67221  | 1.4667   | -1.68947 |
| 6  | 4.03887  | -0.44162 | 0.17178  |
| 6  | 2.37075  | -1.64683 | 2.39384  |
| 6  | 1.4806   | 1.44531  | 3.17942  |
| 8  | 1.43157  | 1.50923  | 4.34136  |
| 6  | 0.17718  | 2.35684  | 0.97328  |
| 8  | -0.75652 | 2.95091  | 0.51986  |
| 3  | -1.02765 | 2.64248  | -1.41125 |
| 7  | -3.10851 | 2.92437  | -1.81963 |
| 6  | -3.76826 | 3.25741  | -0.54231 |
| 6  | -3.0737  | 4.09024  | -2.7295  |
| 6  | -1.97956 | 5.09329  | -2.352   |
| 7  | -0.62892 | 4.49114  | -2.37352 |
| 6  | 0.31902  | 5.31704  | -1.60088 |
| 6  | -0.13324 | 4.32581  | -3.75059 |
| 6  | -3.8054  | 1.79208  | -2.45203 |
| 1  | -0.3125  | -1.59605 | -0.50988 |
| 1  | -1.30541 | -0.2067  | -0.10437 |
| 1  | 0.47662  | 1.17014  | -3.09653 |
| 1  | -1.0684  | 0.31253  | -2.54802 |
| 1  | 3.59906  | 1.84949  | -1.26168 |
| 1  | 2.93146  | 0.88128  | -2.58503 |
| 1  | 2.10192  | 2.33771  | -2.03151 |
| 1  | 3.3435   | -1.28995 | 2.74018  |
| 1  | 1.72048  | -1.71475 | 3.2674   |
| 1  | 2.50703  | -2.66866 | 2.01148  |
| 1  | -0.19888 | -0.79489 | 3.34274  |
| 1  | -1.5344  | -0.38032 | 2.27672  |
| 1  | -0.84972 | -2.00818 | 2.22733  |
| 1  | -2.03848 | 5.96348  | -3.0292  |
| 1  | -2.1577  | 5.4709   | -1.34059 |
| 1  | -2.89876 | 3.71722  | -3.74353 |
| 1  | -4.04798 | 4.60884  | -2.74907 |
| 1  | 1.30425  | 4.84397  | -1.6057  |
| 1  | 0.4161   | 6.33169  | -2.0217  |
| 1  | -0.01508 | 5.38924  | -0.56365 |
| 1  | 0.8548   | 3.85962  | -3.72789 |
| 1  | -0.79598 | 3.67637  | -4.3277  |
| 1  | -0.05095 | 5.29414  | -4.27315 |
| 1  | -3.74354 | 2.3871   | 0.11745  |
| 1  | -3.24012 | 4.06518  | -0.03365 |
| 1  | -4.81874 | 3.55646  | -0.69747 |
| 1  | -3.79148 | 0.93189  | -1.77725 |
| 1  | -4.85648 | 2.03109  | -2.68685 |
| 1  | -3.29672 | 1.50965  | -3.37786 |
| 1  | 4.48328  | -0.73696 | 1.12349  |
| 1  | 4.209    | -1.26136 | -0.5411  |
| 1  | 4.59735  | 0.42254  | -0.19191 |

Compound 8 in position C9 in conformation trans



59

| SCF Done: | E(RB+HF-LYP) = | -2275.15126249 | A.U.     | after | 25 cycles |
|-----------|----------------|----------------|----------|-------|-----------|
| 6         | 1.1556         | -1.44501       | 1.24835  |       |           |
| 6         | 1.36664        | -1.59685       | -0.24401 |       |           |
| 6         | 1.19805        | -0.20097       | -0.81663 |       |           |
| 6         | 2.09215        | 0.81062        | -0.2981  |       |           |
| 6         | 2.24405        | 0.77797        | 1.15769  |       |           |
| 6         | 1.82695        | -0.38505       | 1.90383  |       |           |
| 25        | 0.08023        | 0.49612        | 0.95269  |       |           |
| 6         | -0.61567       | 0.88461        | 2.57361  |       |           |
| 8         | -1.09115       | 1.1306         | 3.60845  |       |           |
| 6         | 0.75321        | -0.13262       | -2.25921 |       |           |
| 6         | 2.68087        | 1.83103        | -1.09645 |       |           |
| 6         | 2.07868        | -0.43526       | 3.40185  |       |           |
| 6         | 0.63858        | -2.66955       | 1.97304  |       |           |
| 6         | -1.3715        | -0.37517       | 0.36413  |       |           |
| 8         | -2.28228       | -0.97606       | -0.04375 |       |           |
| 6         | -0.39226       | 2.12088        | 0.31921  |       |           |
| 8         | -0.67779       | 3.16766        | -0.09755 |       |           |
| 3         | 4.42529        | 0.74116        | -1.58394 |       |           |
| 7         | 6.07234        | -0.18968       | -0.65021 |       |           |
| 6         | 6.71805        | 0.55152        | 0.44787  |       |           |
| 6         | 7.01948        | -0.3872        | -1.76928 |       |           |
| 6         | 6.31002        | -0.73697       | -3.08077 |       |           |
| 7         | 5.27793        | 0.25742        | -3.44426 |       |           |
| 6         | 5.87405        | 1.51139        | -3.94122 |       |           |
| 6         | 4.36092        | -0.2895        | -4.46013 |       |           |
| 6         | 5.55578        | -1.47554       | -0.14001 |       |           |
| 6         | 3.01636        | 1.90481        | 1.81206  |       |           |
| 1         | 2.33621        | -2.08755       | -0.4996  |       |           |
| 1         | 0.58824        | -2.25096       | -0.65303 |       |           |
| 1         | 0.41661        | 0.86878        | -2.54513 |       |           |
| 1         | 1.5621         | -0.41665       | -2.95788 |       |           |
| 1         | -0.07627       | -0.82528       | -2.43843 |       |           |
| 1         | 2.96912        | 2.76504        | -0.61643 |       |           |
| 1         | 2.25163        | 1.98814        | -2.08554 |       |           |
| 1         | 1.84403        | 0.50316        | 3.90752  |       |           |
| 1         | 1.49725        | -1.2186        | 3.88639  |       |           |
| 1         | 3.13879        | -0.65523       | 3.58836  |       |           |
| 1         | 0.22031        | -2.45346       | 2.95875  |       |           |
| 1         | -0.15413       | -3.14424       | 1.38576  |       |           |
| 1         | 1.43309        | -3.42241       | 2.10447  |       |           |
| 1         | 7.06407        | -0.84526       | -3.87986 |       |           |
| 1         | 5.81331        | -1.7078        | -2.98672 |       |           |
| 1         | 7.58717        | 0.54064        | -1.89102 |       |           |
| 1         | 7.75498        | -1.17628       | -1.53642 |       |           |
| 1         | 3.58152        | 0.44386        | -4.68019 |       |           |
| 1         | 4.88641        | -0.53754       | -5.3973  |       |           |
| 1         | 3.87917        | -1.19402       | -4.07959 |       |           |
| 1         | 5.07777        | 2.22402        | -4.17088 |       |           |
| 1         | 6.52001        | 1.96274        | -3.18356 |       |           |
| 1         | 6.47238        | 1.3465         | -4.85299 |       |           |
| 1         | 4.81931        | -1.28619       | 0.64456  |       |           |
| 1         | 5.05683        | -2.03582       | -0.93463 |       |           |
| 1         | 6.36403        | -2.10236       | 0.27217  |       |           |
| 1         | 6.00132        | 0.70053        | 1.25845  |       |           |
| 1         | 7.5926         | 0.01278        | 0.8489   |       |           |
| 1         | 7.04504        | 1.5336         | 0.09435  |       |           |
| 1         | 3.03128        | 1.8336         | 2.89943  |       |           |
| 1         | 4.06233        | 1.9199         | 1.4689   |       |           |
| 1         | 2.5951         | 2.88066        | 1.55229  |       |           |

### Compound 8 in position C9 in conformation cis

|           |                 |                |          |                 |
|-----------|-----------------|----------------|----------|-----------------|
| 59        |                 |                |          |                 |
| SCF Done: | E (RB+HF-LYP) = | -2275.16205746 | A.U.     | after 23 cycles |
| 6         |                 | 1.64686        | -1.04522 | 0.95462         |
| 6         |                 | 0.59499        | -1.50718 | -0.03303        |
| 6         |                 | -0.11333       | -0.2364  | -0.47403        |
| 6         |                 | 0.73774        | 0.73342  | -1.15112        |
| 6         |                 | 1.96225        | 1.01042  | -0.38739        |
| 6         |                 | 2.44595        | 0.0611   | 0.58168         |
| 25        |                 | 0.55361        | 0.87629  | 1.30542         |
| 6         |                 | 1.40212        | 1.67213  | 2.69811         |
| 8         |                 | 1.90855        | 2.20334  | 3.60163         |
| 6         |                 | -1.527         | -0.42457 | -0.97296        |
| 6         |                 | 0.33538        | 1.49126  | -2.259          |
| 6         |                 | 2.83952        | 2.15189  | -0.85361        |
| 6         |                 | 3.80787        | 0.28588  | 1.21547         |
| 6         |                 | 2.07322        | -2.05362 | 2.00022         |
| 6         |                 | -0.67294       | 0.01213  | 2.29796         |
| 8         |                 | -1.48231       | -0.56864 | 2.89934         |
| 6         |                 | -0.38818       | 2.29485  | 0.89385         |
| 8         |                 | -1.00126       | 3.20553  | 0.44159         |
| 3         |                 | -0.8763        | 3.23276  | -1.58684        |
| 7         |                 | -0.3662        | 5.25321  | -2.05114        |
| 6         |                 | -1.7095        | 5.84789  | -2.21304        |
| 6         |                 | -2.65796       | 4.94242  | -3.00374        |
| 7         |                 | -2.83827       | 3.62153  | -2.36498        |
| 1         |                 | 1.01846        | -2.10531 | -0.86762        |
| 1         |                 | -0.12189       | -2.15846 | 0.47957         |
| 1         |                 | -2.05658       | 0.52927  | -1.07885        |
| 1         |                 | -1.54956       | -0.92002 | -1.95934        |
| 1         |                 | -2.103         | -1.04992 | -0.28224        |
| 1         |                 | 1.07715        | 2.08528  | -2.78806        |
| 1         |                 | -0.461         | 1.08549  | -2.88046        |
| 1         |                 | 3.57836        | 2.45133  | -0.10991        |
| 1         |                 | 3.38317        | 1.88034  | -1.77115        |
| 1         |                 | 2.23776        | 3.03453  | -1.09129        |
| 1         |                 | 3.96117        | 1.31297  | 1.55285         |
| 1         |                 | 3.97216        | -0.36754 | 2.07137         |
| 1         |                 | 4.58894        | 0.06093  | 0.47755         |
| 1         |                 | 2.57255        | -1.60628 | 2.86298         |
| 1         |                 | 1.19863        | -2.59258 | 2.37835         |
| 1         |                 | 2.75267        | -2.80718 | 1.57129         |
| 6         |                 | -3.77747       | 3.69432  | -1.23037        |
| 6         |                 | -3.31878       | 2.63137  | -3.34329        |
| 6         |                 | 0.36678        | 5.91869  | -0.95983        |
| 6         |                 | 0.41779        | 5.32981  | -3.29511        |
| 1         |                 | -1.65358       | 6.83326  | -2.70894        |
| 1         |                 | -2.11584       | 6.02276  | -1.21207        |
| 1         |                 | -3.62514       | 5.45872  | -3.1338         |
| 1         |                 | -2.25734       | 4.77602  | -4.00858        |
| 1         |                 | -3.85048       | 2.71341  | -0.75483        |
| 1         |                 | -3.4186        | 4.3976   | -0.4766         |
| 1         |                 | -4.78422       | 4.00532  | -1.5578         |
| 1         |                 | -3.42465       | 1.65855  | -2.85677        |
| 1         |                 | -4.29474       | 2.91433  | -3.77319        |
| 1         |                 | -2.5942        | 2.5282   | -4.15578        |
| 1         |                 | 1.34642        | 5.44864  | -0.83924        |
| 1         |                 | 0.51831        | 6.99295  | -1.16008        |
| 1         |                 | -0.18127       | 5.80334  | -0.02204        |
| 1         |                 | 1.39073        | 4.85707  | -3.14025        |

|   |          |         |          |
|---|----------|---------|----------|
| 1 | -0.08474 | 4.79644 | -4.10541 |
| 1 | 0.58109  | 6.37427 | -3.61223 |

### Compound 8 in position C11 in conformation trans

59  
SCF Done: E(RB+HF-LYP) = -2275.14556017 A.U. after 24 cycles

|    |          |          |          |
|----|----------|----------|----------|
| 6  | 0.7057   | -0.80911 | 1.78258  |
| 6  | 1.34533  | -1.56483 | 0.6355   |
| 6  | 1.49405  | -0.52179 | -0.45325 |
| 6  | 2.15238  | 0.68605  | -0.10184 |
| 6  | 2.23116  | 1.09792  | 1.29067  |
| 6  | 1.34019  | 0.3917   | 2.19744  |
| 25 | 0.04115  | 0.86213  | 0.48623  |
| 6  | -0.9782  | 1.84111  | 1.60517  |
| 8  | -1.64432 | 2.46105  | 2.33265  |
| 6  | 1.41229  | -1.01938 | -1.88001 |
| 6  | 2.86692  | 1.53251  | -1.13364 |
| 6  | 1.19048  | 0.92685  | 3.6054   |
| 6  | -0.2029  | -1.60631 | 2.69305  |
| 6  | -1.27579 | -0.18493 | -0.11431 |
| 8  | -2.11915 | -0.89001 | -0.50288 |
| 6  | -0.13662 | 2.14858  | -0.76385 |
| 8  | -0.25252 | 2.96978  | -1.5821  |
| 3  | 4.92565  | 1.18035  | 2.22775  |
| 7  | 5.63559  | -0.76611 | 2.52615  |
| 6  | 4.75303  | -1.61567 | 3.34622  |
| 6  | 6.93679  | -0.5471  | 3.1917   |
| 6  | 7.67417  | 0.67539  | 2.63215  |
| 7  | 6.84455  | 1.89826  | 2.68399  |
| 6  | 6.76934  | 2.45325  | 4.04751  |
| 6  | 7.34962  | 2.92489  | 1.75626  |
| 6  | 5.79771  | -1.36504 | 1.18809  |
| 1  | 2.30228  | -2.06767 | 0.90687  |
| 1  | 0.67048  | -2.35757 | 0.29485  |
| 1  | 1.24175  | -0.22199 | -2.60711 |
| 1  | 2.33618  | -1.54653 | -2.17079 |
| 1  | 0.59008  | -1.73416 | -1.98546 |
| 1  | 2.68231  | 2.60042  | -0.99444 |
| 1  | 3.95335  | 1.3798   | -1.04286 |
| 1  | 2.5847   | 1.2706   | -2.15336 |
| 1  | 1.05715  | 2.01114  | 3.62366  |
| 1  | 0.35258  | 0.47384  | 4.13538  |
| 1  | 2.10272  | 0.70588  | 4.18052  |
| 1  | -0.85172 | -0.98162 | 3.31126  |
| 1  | -0.85199 | -2.26042 | 2.10243  |
| 1  | 0.37918  | -2.25615 | 3.36768  |
| 1  | 8.62357  | 0.80773  | 3.17921  |
| 1  | 7.94006  | 0.49967  | 1.58498  |
| 1  | 6.7438   | -0.40575 | 4.25984  |
| 1  | 7.58935  | -1.43312 | 3.1056   |
| 1  | 6.68736  | 3.79409  | 1.78071  |
| 1  | 8.36995  | 3.25292  | 2.01625  |
| 1  | 7.35912  | 2.53236  | 0.73554  |
| 1  | 6.10731  | 3.32299  | 4.04923  |
| 1  | 6.35828  | 1.71733  | 4.74347  |
| 1  | 7.76076  | 2.76398  | 4.41796  |
| 1  | 4.81731  | -1.47043 | 0.71704  |
| 1  | 6.41371  | -0.7261  | 0.54953  |
| 1  | 6.27132  | -2.3597  | 1.24141  |

|   |         |          |         |
|---|---------|----------|---------|
| 1 | 3.7816  | -1.70949 | 2.85481 |
| 1 | 5.17247 | -2.62446 | 3.49542 |
| 1 | 4.59887 | -1.15464 | 4.32602 |
| 6 | 3.13683 | 2.13477  | 1.7419  |
| 1 | 2.8323  | 2.64936  | 2.65533 |
| 1 | 3.41467 | 2.86834  | 0.9827  |

Compound 8 in position C11 in conformation cis

59

SCF Done: E(RB+HF-LYP) = -2275.15319007 A.U. after 23 cycles

|    |          |          |          |
|----|----------|----------|----------|
| 6  | 1.28976  | 0.49189  | 2.1692   |
| 6  | 0.74545  | -0.74018 | 1.75707  |
| 6  | 1.52296  | -1.53232 | 0.72683  |
| 6  | 1.77513  | -0.53632 | -0.38566 |
| 6  | 2.3752   | 0.69668  | -0.0225  |
| 6  | 2.33427  | 1.14533  | 1.36829  |
| 25 | 0.18739  | 0.86419  | 0.27277  |
| 6  | 0.14067  | 1.86145  | -1.21216 |
| 8  | 0.13294  | 2.47028  | -2.21158 |
| 6  | -0.24634 | -1.51241 | 2.59871  |
| 6  | 1.88322  | -1.10554 | -1.78316 |
| 6  | 3.2317   | 1.48003  | -0.99056 |
| 6  | 3.09599  | 2.22777  | 1.8528   |
| 6  | 0.96329  | 1.07665  | 3.5239   |
| 6  | -0.92326 | 1.97857  | 1.12516  |
| 8  | -1.69277 | 2.68678  | 1.66234  |
| 6  | -1.05542 | -0.29503 | -0.28808 |
| 8  | -1.87529 | -1.03241 | -0.66404 |
| 3  | 1.35695  | 3.51193  | 1.37892  |
| 7  | 1.24141  | 5.26047  | 0.10982  |
| 6  | -0.09828 | 5.41514  | -0.49675 |
| 6  | 2.26113  | 5.30553  | -0.95432 |
| 6  | 1.50616  | 6.33464  | 1.08933  |
| 6  | 0.64563  | 6.21862  | 2.34584  |
| 7  | 0.8823   | 4.96657  | 3.09492  |
| 6  | -0.26208 | 4.70499  | 3.98775  |
| 6  | 2.11537  | 5.06647  | 3.89598  |
| 1  | 2.44982  | -1.98256 | 1.13532  |
| 1  | 0.90636  | -2.35585 | 0.35212  |
| 1  | 1.80024  | -0.35001 | -2.56784 |
| 1  | 2.84491  | -1.6255  | -1.91869 |
| 1  | 1.09215  | -1.84205 | -1.95469 |
| 1  | 3.13223  | 2.55805  | -0.84578 |
| 1  | 4.28955  | 1.23101  | -0.82333 |
| 1  | 3.00047  | 1.25425  | -2.0317  |
| 1  | 0.97537  | 2.16803  | 3.51263  |
| 1  | -0.01053 | 0.75432  | 3.89312  |
| 1  | 1.72055  | 0.75597  | 4.25371  |
| 1  | -0.97954 | -0.87641 | 3.0997   |
| 1  | -0.79939 | -2.22399 | 1.97885  |
| 1  | 0.27779  | -2.09596 | 3.37165  |
| 1  | 0.82978  | 7.09904  | 2.98666  |
| 1  | -0.41229 | 6.25147  | 2.07157  |
| 1  | 2.56759  | 6.28912  | 1.35556  |
| 1  | 1.33479  | 7.32668  | 0.63347  |
| 1  | -0.07299 | 3.80412  | 4.57586  |
| 1  | -0.43268 | 5.5417   | 4.6869   |
| 1  | -1.16464 | 4.5384   | 3.3963   |
| 1  | 2.27396  | 4.13463  | 4.44318  |
| 1  | 2.98379  | 5.22215  | 3.25211  |

|   |          |         |          |
|---|----------|---------|----------|
| 1 | 2.05831  | 5.89553 | 4.6229   |
| 1 | -0.22364 | 4.67486 | -1.28675 |
| 1 | -0.88376 | 5.25009 | 0.24327  |
| 1 | -0.22553 | 6.42122 | -0.93189 |
| 1 | 2.06375  | 4.51725 | -1.68354 |
| 1 | 2.25799  | 6.27536 | -1.48084 |
| 1 | 3.25393  | 5.14709 | -0.52344 |
| 1 | 3.17542  | 2.36388 | 2.92659  |
| 1 | 3.96009  | 2.55608 | 1.28395  |

### Compound 7 in position C7 in conformation trans

56

SCF Done: E(RB+HF-LYP) = -2235.84736648 A.U. after 23 cycles

|    |          |          |          |
|----|----------|----------|----------|
| C  | -0.28054 | -0.68995 | -0.23615 |
| C  | 0.47901  | 0.16629  | -1.23704 |
| C  | 1.77585  | 0.62549  | -0.82701 |
| C  | 2.45968  | 0.01178  | 0.29725  |
| C  | 1.71607  | -0.63237 | 1.31494  |
| C  | 0.28778  | -0.55276 | 1.16663  |
| C  | -0.09221 | 0.40429  | -2.48026 |
| Mn | 1.20361  | 1.42872  | 1.20044  |
| C  | -0.35815 | 2.27016  | 0.92546  |
| O  | -1.39547 | 2.76516  | 0.73214  |
| C  | 2.59518  | 1.44358  | -1.80347 |
| C  | 2.42226  | -1.30232 | 2.47341  |
| C  | -0.63025 | -1.09605 | 2.24279  |
| C  | 2.30885  | 2.84547  | 1.02354  |
| O  | 3.02152  | 3.76107  | 0.91097  |
| C  | 1.20137  | 1.63868  | 2.97875  |
| O  | 1.20369  | 1.75691  | 4.13941  |
| Li | 0.62839  | -1.60461 | -2.90025 |
| H  | 3.544    | 0.06399  | 0.35746  |
| H  | -0.29915 | -1.7586  | -0.56476 |
| H  | -1.33331 | -0.38173 | -0.23447 |
| H  | 0.36554  | 1.09357  | -3.18467 |
| H  | -1.16287 | 0.24668  | -2.60684 |
| H  | 3.53935  | 1.76388  | -1.35492 |
| H  | 2.8348   | 0.87419  | -2.71714 |
| H  | 2.06292  | 2.34493  | -2.1255  |
| H  | 3.45332  | -0.94454 | 2.56005  |
| H  | 1.92687  | -1.12002 | 3.42989  |
| H  | 2.45198  | -2.39206 | 2.3295   |
| H  | -0.26589 | -0.89575 | 3.25321  |
| H  | -1.62532 | -0.64356 | 2.1627   |
| H  | -0.76641 | -2.18786 | 2.1502   |
| N  | -0.3853  | -3.02927 | -4.03119 |
| N  | 2.2758   | -2.87677 | -2.79193 |
| C  | 1.95346  | -3.88594 | -3.82574 |
| C  | 0.46047  | -4.23104 | -3.85238 |
| C  | -1.77049 | -3.28739 | -3.59697 |
| C  | -0.38341 | -2.56323 | -5.43075 |
| H  | 0.27343  | -4.97529 | -4.64505 |
| H  | 0.17206  | -4.70165 | -2.90745 |
| H  | 2.25722  | -3.47815 | -4.79525 |
| H  | 2.53621  | -4.81087 | -3.67728 |
| C  | 2.29905  | -3.47323 | -1.43977 |
| C  | 3.57983  | -2.24277 | -3.06632 |
| H  | -2.3627  | -2.37586 | -3.7111  |
| H  | -2.24484 | -4.08909 | -4.18632 |

|   |          |          |          |
|---|----------|----------|----------|
| H | -1.78307 | -3.57364 | -2.54165 |
| H | -0.97254 | -1.64583 | -5.50822 |
| H | 0.63343  | -2.3397  | -5.76367 |
| H | -0.81254 | -3.31684 | -6.11165 |
| H | 2.50107  | -2.69236 | -0.70317 |
| H | 1.33186  | -3.92076 | -1.19735 |
| H | 3.07348  | -4.25369 | -1.35855 |
| H | 3.77807  | -1.48193 | -2.30829 |
| H | 4.4027   | -2.97601 | -3.05365 |
| H | 3.56073  | -1.75752 | -4.04648 |

Compound 7 in position C7 in conformation cis

56

SCF Done: E(RB+HF-LYP) = -2235.86602637 A.U. after 23 cycles

|    |          |          |          |
|----|----------|----------|----------|
| 6  | 1.62854  | -0.98052 | 0.95938  |
| 6  | 0.65831  | -1.4958  | 0.06917  |
| 6  | -0.15436 | -0.49257 | -0.56224 |
| 6  | 0.56674  | 0.76747  | -1.03053 |
| 6  | 1.41904  | 1.36004  | 0.07243  |
| 6  | 1.74479  | 0.44683  | 1.15619  |
| 25 | -0.27397 | -0.37586 | 1.62482  |
| 6  | -1.11956 | 1.1409   | 1.56868  |
| 8  | -1.53768 | 2.25369  | 1.44326  |
| 6  | 0.52984  | -2.98461 | -0.15942 |
| 6  | -1.31348 | -0.89255 | -1.45267 |
| 6  | 1.79773  | 2.67814  | 0.01657  |
| 6  | 2.70164  | 0.92866  | 2.22811  |
| 1  | 2.26716  | -1.6529  | 1.52566  |
| 6  | 0.08881  | -0.49101 | 3.39188  |
| 8  | 0.31542  | -0.52128 | 4.53588  |
| 6  | -1.67002 | -1.50817 | 1.79549  |
| 8  | -2.57825 | -2.23029 | 1.89407  |
| 3  | -0.05171 | 3.53834  | 1.14605  |
| 7  | 0.22273  | 4.58907  | 2.97641  |
| 6  | 1.60602  | 5.05997  | 3.16184  |
| 6  | -0.70997 | 5.71754  | 2.76708  |
| 6  | -0.61184 | 6.30498  | 1.35642  |
| 7  | -0.90967 | 5.30465  | 0.30784  |
| 6  | -0.35747 | 5.72996  | -0.98896 |
| 6  | -2.36183 | 5.07935  | 0.17486  |
| 6  | -0.18823 | 3.78812  | 4.14621  |
| 1  | 1.20288  | 0.56148  | -1.91151 |
| 1  | -0.17046 | 1.50852  | -1.36542 |
| 1  | 2.53459  | 3.0923   | 0.69968  |
| 1  | 1.57062  | 3.26345  | -0.87252 |
| 1  | 2.8713   | 0.15737  | 2.98381  |
| 1  | 3.67656  | 1.20144  | 1.79719  |
| 1  | 2.32202  | 1.81448  | 2.75053  |
| 1  | 0.98783  | -3.54696 | 0.66055  |
| 1  | -0.51017 | -3.30795 | -0.24673 |
| 1  | 1.03804  | -3.27013 | -1.09089 |
| 1  | -1.87556 | -1.74409 | -1.06165 |
| 1  | -2.01857 | -0.06044 | -1.56287 |
| 1  | -0.969   | -1.15762 | -2.46606 |
| 1  | -0.5359  | 6.52035  | 3.50501  |
| 1  | -1.72384 | 5.34513  | 2.94233  |
| 1  | 0.40128  | 6.68062  | 1.18176  |
| 1  | -1.28683 | 7.17503  | 1.27936  |
| 1  | 0.49022  | 2.94021  | 4.26744  |

|   |          |         |          |
|---|----------|---------|----------|
| 1 | -0.17466 | 4.383   | 5.07458  |
| 1 | -1.19475 | 3.39455 | 3.98907  |
| 1 | 2.26687  | 4.20079 | 3.29895  |
| 1 | 1.95176  | 5.61051 | 2.28349  |
| 1 | 1.69842  | 5.7159  | 4.04427  |
| 1 | -2.54204 | 4.30045 | -0.56958 |
| 1 | -2.78693 | 4.73212 | 1.1178   |
| 1 | -2.88496 | 5.99897 | -0.13749 |
| 1 | -0.56705 | 4.96672 | -1.74331 |
| 1 | -0.79296 | 6.68379 | -1.33206 |
| 1 | 0.72695  | 5.8484  | -0.91353 |

### Compound 7 in position C9 in conformation trans

56

SCF Done: E(RB+HF-LYP) = -2235.84007733 A.U. after 23 cycles

|    |          |          |          |
|----|----------|----------|----------|
| C  | 1.25695  | -1.60724 | -0.30732 |
| C  | 1.13202  | -0.19777 | -0.87027 |
| C  | 2.081    | 0.7762   | -0.38673 |
| C  | 2.31302  | 0.67734  | 1.04393  |
| C  | 1.90476  | -0.45393 | 1.81541  |
| C  | 1.14837  | -1.47472 | 1.2003   |
| Mn | 0.14397  | 0.52468  | 0.9878   |
| C  | -1.37947 | -0.27393 | 0.48358  |
| O  | -2.33783 | -0.83293 | 0.12976  |
| C  | 0.62192  | -0.09553 | -2.28836 |
| C  | 2.65657  | 1.82838  | -1.15185 |
| C  | 2.26168  | -0.47542 | 3.28891  |
| C  | 0.65646  | -2.68697 | 1.95657  |
| C  | -0.29954 | 2.18008  | 0.40777  |
| O  | -0.57694 | 3.24065  | 0.02431  |
| C  | -0.43088 | 0.92414  | 2.65301  |
| O  | -0.82801 | 1.18037  | 3.71728  |
| Li | 4.36778  | 0.72074  | -1.66053 |
| H  | 2.8795   | 1.46433  | 1.53466  |
| H  | 2.18037  | -2.14689 | -0.62587 |
| H  | 0.42096  | -2.21344 | -0.67472 |
| H  | 0.32785  | 0.92544  | -2.55101 |
| H  | 1.3833   | -0.41453 | -3.02463 |
| H  | -0.25036 | -0.74167 | -2.43511 |
| H  | 2.98845  | 2.70741  | -0.59322 |
| H  | 2.17665  | 2.08613  | -2.0954  |
| H  | 2.51809  | 0.52646  | 3.64486  |
| H  | 1.45194  | -0.85284 | 3.91636  |
| H  | 3.12998  | -1.12786 | 3.45319  |
| H  | 0.42024  | -2.4766  | 3.00248  |
| H  | -0.24873 | -3.09004 | 1.49006  |
| H  | 1.40866  | -3.4928  | 1.94168  |
| N  | 5.3418   | 0.22754  | -3.44818 |
| N  | 5.9521   | -0.13961 | -0.60396 |
| C  | 6.99319  | -0.28817 | -1.64315 |
| C  | 6.40243  | -0.69915 | -2.99697 |
| C  | 4.49195  | -0.4     | -4.47582 |
| C  | 5.90123  | 1.48833  | -3.96971 |
| H  | 7.21536  | -0.77288 | -3.7398  |
| H  | 5.9592   | -1.69671 | -2.91908 |
| H  | 7.50696  | 0.6737   | -1.73958 |
| H  | 7.75889  | -1.02456 | -1.34447 |
| C  | 5.48758  | -1.44732 | -0.10202 |
| C  | 6.43735  | 0.67819  | 0.52184  |

|   |         |          |          |
|---|---------|----------|----------|
| H | 3.68934 | 0.28764  | -4.75409 |
| H | 5.06308 | -0.65893 | -5.38289 |
| H | 4.03693 | -1.3113  | -4.07813 |
| H | 5.0849  | 2.1615   | -4.24385 |
| H | 6.50745 | 1.98793  | -3.2095  |
| H | 6.53161 | 1.31807  | -4.85861 |
| H | 4.68064 | -1.2925  | 0.61787  |
| H | 5.09261 | -2.05815 | -0.91792 |
| H | 6.3027  | -2.00685 | 0.38667  |
| H | 5.63247 | 0.80419  | 1.25007  |
| H | 7.30044 | 0.21466  | 1.02795  |
| H | 6.73373 | 1.66806  | 0.16298  |

### Compound 7 in position C9 in conformation cis

56

SCF Done: E(RB+HF-LYP) = -2235.84932393 A.U. after 23 cycles

|    |          |          |          |
|----|----------|----------|----------|
| 6  | 1.63664  | -0.98365 | 0.99891  |
| 6  | 0.71186  | -1.48033 | 0.05499  |
| 6  | -0.18679 | -0.46388 | -0.62422 |
| 6  | -0.71058 | 0.4373   | 0.48867  |
| 6  | 0.31291  | 1.16289  | 1.22819  |
| 6  | 1.38262  | 0.26358  | 1.64227  |
| 25 | -0.28685 | -1.09681 | 2.02864  |
| 6  | -1.03677 | -0.16852 | 3.3104   |
| 8  | -1.49591 | 0.59892  | 4.09006  |
| 6  | 0.90577  | -2.80282 | -0.64985 |
| 6  | -2.01847 | 1.136    | 0.19996  |
| 6  | 0.20321  | 2.4708   | 1.71613  |
| 1  | 2.1176   | 0.62487  | 2.35693  |
| 6  | 2.88229  | -1.7473  | 1.39928  |
| 6  | 0.36369  | -2.36357 | 3.15416  |
| 8  | 0.74322  | -3.1704  | 3.90186  |
| 6  | -1.7279  | -2.03703 | 1.50156  |
| 8  | -2.66667 | -2.61338 | 1.12789  |
| 3  | -0.87494 | 2.47916  | 3.6493   |
| 7  | 0.06186  | 3.16579  | 5.43853  |
| 6  | 1.12342  | 4.13997  | 5.13608  |
| 6  | -1.0823  | 3.79896  | 6.12707  |
| 6  | -1.9586  | 4.61504  | 5.17165  |
| 7  | -2.50679 | 3.79386  | 4.07132  |
| 6  | -2.90656 | 4.63935  | 2.93413  |
| 6  | 0.61342  | 2.06495  | 6.24756  |
| 6  | -3.65783 | 2.98957  | 4.52075  |
| 1  | 0.32851  | 0.08249  | -1.44245 |
| 1  | -1.03288 | -0.98341 | -1.08852 |
| 1  | -2.43917 | 1.60652  | 1.09655  |
| 1  | -1.8968  | 1.93104  | -0.55609 |
| 1  | -2.76217 | 0.43085  | -0.18694 |
| 1  | 1.10211  | 2.92382  | 2.13591  |
| 1  | -0.47483 | 3.15521  | 1.20933  |
| 1  | 3.26044  | -1.40763 | 2.36776  |
| 1  | 2.71834  | -2.8248  | 1.46238  |
| 1  | 3.6684   | -1.5787  | 0.65188  |
| 1  | 1.38363  | -3.56086 | -0.02413 |
| 1  | -0.0574  | -3.20644 | -0.97887 |
| 1  | 1.52573  | -2.67664 | -1.55171 |
| 1  | -0.74226 | 4.45096  | 6.95121  |
| 1  | -1.67692 | 3.0012   | 6.58261  |
| 1  | -2.76527 | 5.10133  | 5.74768  |



|   |          |         |         |
|---|----------|---------|---------|
| 1 | -1.36685 | 5.42015 | 4.72502 |
| 1 | -4.00774 | 2.36226 | 3.69756 |
| 1 | -3.36901 | 2.32561 | 5.33737 |
| 1 | -4.49087 | 3.62921 | 4.85881 |
| 1 | -3.28037 | 4.00732 | 2.12445 |
| 1 | -3.6974  | 5.3577  | 3.20958 |
| 1 | -2.04198 | 5.19485 | 2.56059 |
| 1 | 1.4377   | 1.59249 | 5.70664 |
| 1 | 0.9931   | 2.41866 | 7.2212  |
| 1 | -0.1563  | 1.30895 | 6.41847 |
| 1 | 1.93049  | 3.64048 | 4.59453 |
| 1 | 0.7446   | 4.94335 | 4.49984 |
| 1 | 1.53998  | 4.58856 | 6.05459 |

### Compound 7 in position C3

56

SCF Done: E(RB+HF-LYP) = -2235.83540556 A.U. after 25 cycles

|    |          |          |          |
|----|----------|----------|----------|
| C  | 0.19828  | -1.46407 | -0.13478 |
| C  | 1.1534   | -0.52642 | -0.84328 |
| C  | 2.27911  | -0.07553 | -0.11193 |
| C  | 2.28029  | 0.00452  | 1.33172  |
| C  | 1.02387  | -0.35956 | 1.95214  |
| C  | -0.08606 | -0.81617 | 1.20392  |
| Mn | 0.62266  | 1.22094  | 0.49156  |
| C  | -0.92894 | 1.35204  | -0.39367 |
| O  | -1.93762 | 1.40115  | -0.97316 |
| C  | 1.10902  | -0.55902 | -2.3547  |
| C  | 3.53004  | 0.3742   | -0.85015 |
| C  | 0.90477  | -0.21115 | 3.46106  |
| C  | -1.42391 | -1.14767 | 1.8264   |
| C  | 1.4304   | 2.59642  | -0.33332 |
| O  | 1.95184  | 3.49713  | -0.86061 |
| C  | 0.18952  | 2.32202  | 1.84199  |
| O  | -0.07606 | 3.04884  | 2.7159   |
| Li | 3.77699  | 0.89881  | 2.39796  |
| H  | 0.59699  | -2.49555 | -0.03817 |
| H  | -0.73172 | -1.5467  | -0.70926 |
| H  | 1.64395  | 0.27029  | -2.82317 |
| H  | 1.54834  | -1.49583 | -2.73404 |
| H  | 0.07324  | -0.52708 | -2.70941 |
| H  | 4.16673  | 0.98104  | -0.19872 |
| H  | 4.10982  | -0.50649 | -1.15927 |
| H  | 3.32804  | 0.95793  | -1.75176 |
| H  | 1.69998  | 0.43106  | 3.85278  |
| H  | -0.04877 | 0.20944  | 3.78984  |
| H  | 1.00563  | -1.196   | 3.93758  |
| H  | -1.68494 | -0.50204 | 2.66804  |
| H  | -2.22519 | -1.06448 | 1.08436  |
| H  | -1.43206 | -2.18821 | 2.18926  |
| N  | 4.4943   | 2.83294  | 2.88971  |
| N  | 5.3362   | 0.11242  | 3.59366  |
| C  | 5.82533  | 1.29012  | 4.33926  |
| C  | 5.81974  | 2.5605   | 3.4815   |
| C  | 4.60732  | 3.77214  | 1.75885  |
| C  | 3.55104  | 3.37389  | 3.88704  |
| H  | 6.17038  | 3.40964  | 4.09429  |
| H  | 6.53491  | 2.45488  | 2.65941  |
| H  | 5.17205  | 1.42721  | 5.20648  |
| H  | 6.84295  | 1.12469  | 4.73489  |
| C  | 6.3438   | -0.40162 | 2.65073  |

|   |         |          |         |
|---|---------|----------|---------|
| C | 4.91735 | -0.96279 | 4.50693 |
| H | 3.62449 | 3.92681  | 1.30986 |
| H | 5.00975 | 4.74923  | 2.07507 |
| H | 5.2684  | 3.35563  | 0.99333 |
| H | 2.57672 | 3.53496  | 3.42065 |
| H | 3.4146  | 2.6704   | 4.71284 |
| H | 3.90696 | 4.33122  | 4.3042  |
| H | 5.91618 | -1.23174 | 2.08253 |
| H | 6.64134 | 0.37384  | 1.94021 |
| H | 7.24842 | -0.75829 | 3.17255 |
| H | 4.50716 | -1.79218 | 3.92507 |
| H | 5.75631 | -1.33963 | 5.11652 |
| H | 4.13507 | -0.59829 | 5.17854 |
